# Supplementary material for: Contributions of T cell dysfunction to the resistance against anti-PD-1 therapy in oral carcinogenesis
Source: PubMed Central journal article supplement (PMC6617956; doi:10.1186/s13046-019-1185-0), 2019-07-10
Supplement: 13046_2019_1185_MOESM3_ESM.pdf [file 13046_2019_1185_MOESM3_ESM.pdf]

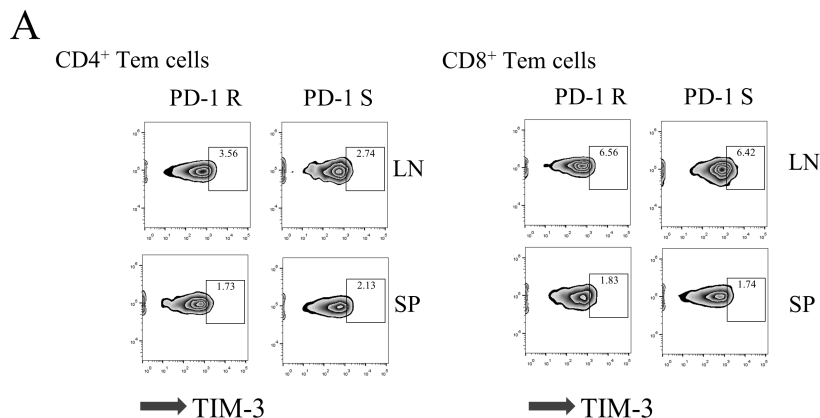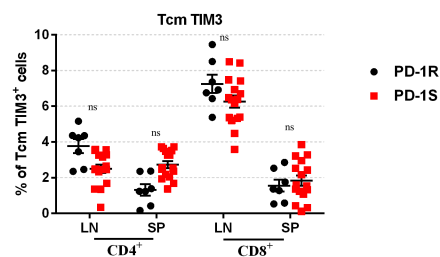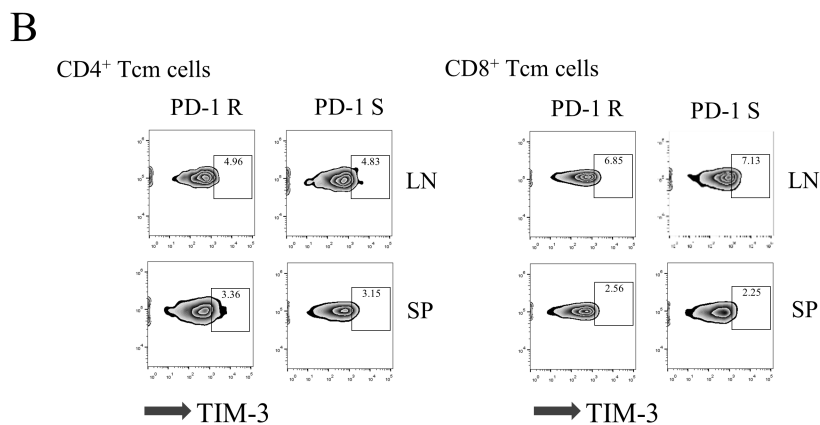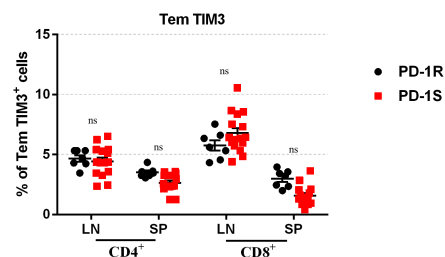

Fig. S2 The expression of TIM-3 in Tcm and Tem cells in draining lymph nodes and spleen. (A) The expression of TIM-3 on CD4<sup>+</sup>/CD8<sup>+</sup> Tem cells between PD-1R group and PD-1S groups were analyzed by flow cytometry. Representative flow cytometry dot plots show the analysis of TIM-3 expression on CD4<sup>+</sup> and CD8<sup>+</sup> Tcm cells(left). The expression level of TIM-3 in Tcm cells were higher in lymph nodes of PD-1R group(right). (B) The expression of TIM-3 on CD4<sup>+</sup>/CD8<sup>+</sup> Tem cells between PD-1S group and PD-1R group was analyzed by flow cytometry. Representative flow cytometry dot plots show the analysis of TIM-3 expression on CD4<sup>+</sup> and CD8<sup>+</sup> Tem cells(left). The expression level of TIM-3 in Tem cells were higher in CD8<sup>+</sup> lymph nodes of PD-1R group(right). All data represent the average  $\pm$  SEM. Statistical significance was determined by Student's t test, \*P < 0.05, \*\*P < 0.01.
